# Supplementary material for: ADAMTSL3 knock-out mice develop cardiac dysfunction and dilatation with increased TGFβ signalling after pressure overload
Source: PubMed Central journal article supplement (PMC9767913; doi:10.1038/s42003-022-04361-1), 2022-12-20
Supplement: 42003_2022_4361_MOESM1_ESM.pdf [file 42003_2022_4361_MOESM1_ESM.pdf]

## Supplementary information

# ADAMTSL3 knock-out mice develop cardiac dysfunction and dilatation with increased TGF $\beta$ signalling after pressure overload

Karoline B. Rypdal<sup>1,2,3\*</sup>, A. Olav Melleby<sup>1,4</sup>, Emma L. Robinson<sup>5</sup>, Jia Li<sup>1</sup>, Sheryl Palmero<sup>1</sup>, Deborah E. Seifert<sup>6</sup>, Daniel Martin<sup>6</sup>, Catelyn Clark<sup>6</sup>, Begoña López<sup>7,8</sup>, Kristine Andreassen<sup>1</sup>, Christen P. Dahl<sup>9</sup>, Ivar Sjaastad<sup>1</sup>, Theis Tønnessen<sup>1,10</sup>, Mathis K. Stokke<sup>1</sup>, William E. Louch<sup>1</sup>, Arantxa González<sup>7,8</sup>, Stephane Heymans<sup>5,11</sup>, Geir Christensen<sup>1</sup>, Suneel S. Apte<sup>6</sup>, Ida G. Lunde<sup>1,2,3</sup>

<sup>1</sup>*Institute for Experimental Medical Research, Oslo University Hospital and University of Oslo, Oslo, Norway.*

<sup>2</sup>*Division of Diagnostics and Technology, Akershus University Hospital, Lørenskog, Norway.*

<sup>3</sup>*K.G. Jebsen Center for Cardiac Biomarkers, University of Oslo, Oslo, Norway.*

<sup>4</sup>*Department of Molecular Medicine, Institute of Basic Medical Sciences, University of Oslo, Oslo, Norway.*

<sup>5</sup>*Department of Cardiology, Maastricht University, CARIM School for Cardiovascular Diseases, Maastricht, Netherlands.*

<sup>6</sup>*Department of Biomedical Engineering, Cleveland Clinic Lerner Research Institute, Cleveland, OH USA.*

<sup>7</sup>*Program of Cardiovascular Diseases, CIMA Universidad de Navarra and IdiSNA, Pamplona, Spain.*

<sup>8</sup>*CIBERCV, Carlos III Institute of Health, Madrid, Spain.*

<sup>9</sup>*Department of Cardiology, Oslo University Hospital Rikshospitalet, Oslo, Norway.*

<sup>10</sup>*Department of Cardiothoracic Surgery, Oslo University Hospital Ullevål, Oslo, Norway.*

<sup>11</sup>*Centre for Molecular and Vascular Biology, Department of Cardiovascular Sciences, Leuven, Belgium.*

\*Corresponding author contact details:

Karoline Bjarnesdatter Rypdal, MSc, PhD  
Institute for Experimental Medical Research (IEMR),  
Oslo University Hospital Ullevål,  
Building 7, 4<sup>th</sup> floor, Kirkeveien 166, 0407 Oslo, Norway.  
Phone: +4791193598  
e-mail: k.b.rypdal@medisin.uio.no

## Supplementary figures

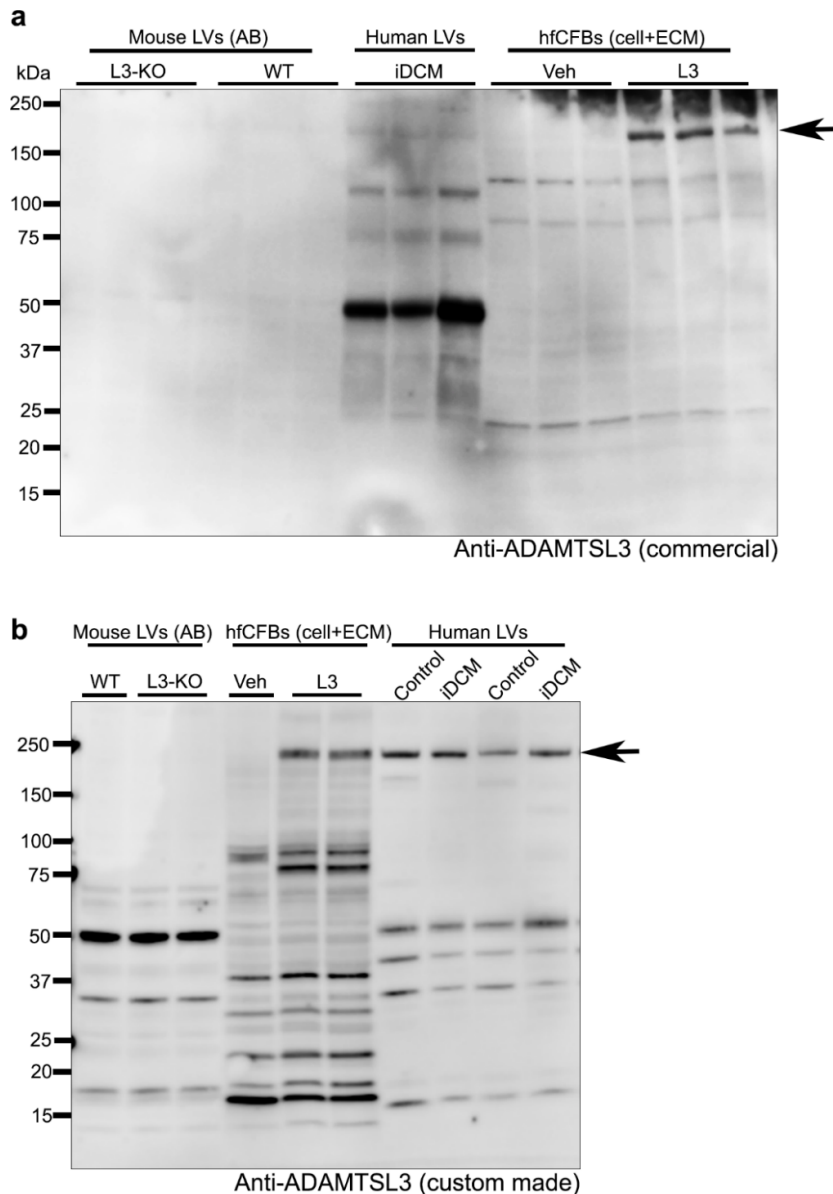

**Fig. S1 ADAMTSL3 antibodies detect human, but not mouse ADAMTSL3**

Representative immunoblots of ADAMTSL3 antibody validation in left ventricular (LV) tissue from mouse (after aortic banding (AB)) and human (control or ischemic dilated cardiomyopathy (iDCM)). ADAMTSL3 is an ECM glycoprotein with expected size of 210 kDa<sup>1</sup> (1691 amino acids). LV tissue from L3-KO mice was used as negative control and human foetal cardiac fibroblasts (hfCFB) overexpressing ADAMTSL3 (L3) was used as positive control (hfCFB lysates including cell and extracellular matrix (ECM) proteins). ADAMTSL3 detection on immunoblots is indicated by arrows. **(a)** The commercially available anti-ADAMTSL3 polyclonal antibody HPA03473 (Merck), immunised to aa 1016-1110, sequence ALREPMREYPGMDHSEANSLGVTWHKMRQMWNKNDLYLDDDDHISNQPFLRALLGHCSNSAGSTNS WELKNKQFEAAVKQGAYSMDTAQFDELIR, interspersed between the Ig-like C2-type 1 and Ig-like C2-type 2 domain. **(b)** A custom made antibody for the N-terminal region of ADAMTSL3. Both antibodies detected the positive control, with no signal in negative control. None of the antibodies detected ADAMTSL3 in mouse LV, while the custom-made antibody was superior to the commercially available in detection of ADAMTSL3 in human LV. Thus, the latter was used in our study in lysates from human LV biopsies and hfCFBs.

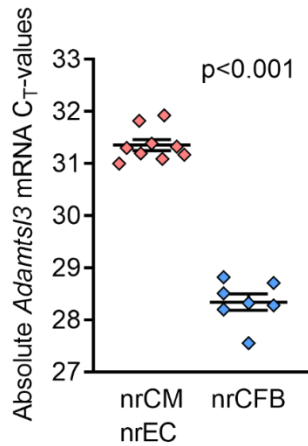

**Fig. S2 *Adamts13* expression is negligible in primary cardiomyocytes**

Absolute  $C_T$ -values for *Adamts13* in mRNA samples from primary cultures from neonatal rats (1-3 day old). Cardiac fibroblasts (nrCFB) were separated from cardiomyocytes (nrCM), and endothelial cells (nrEC) were detected in the nrCM fraction<sup>2</sup>. n=3 isolations of n=60 hearts, with n=1-3 culture replicates per isolation.  $C_T$  values for *Adamts13* in nrCM/nrEC were 31-32, with 20ng input cDNA, indicating low expression. Data are shown as individual value scatter plot with mean  $\pm$  SEM. Statistical analysis was performed on nrCFBs vs. nrCMs using the Student's *t*-test.

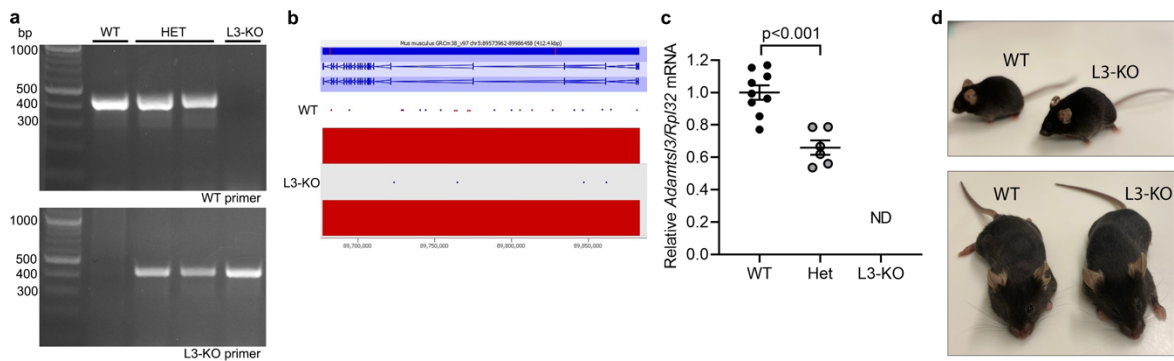

**Fig. S3 Characterization of a novel *Adamts13* knock-out allele**

*Adamts13* was disrupted using CRISPR-Cas9 in C57BL/6J mice. Mice hemizygous for the targeted allele were intercrossed to homozygosity to generate *Adamts13* knock-out (L3-KO) mice. (a) PCR products from genotyping of ear biopsies from wild-type (WT), heterozygous (Het), and L3-KO mice. Genotyping was performed with two PCR reactions using separate WT and L3-KO forward primers and a common reverse primer, that each result in an allele-specific 428 bp PCR product. Genotyping of Hets provided both products, whereas specific PCR products were seen in WTs and L3-KOs as appropriate. (b) RNA-seq of WT and L3-KO left ventricular (LV) tissue, with several *Adamts13* reads in WT, and negligible numbers in L3-KO. (c) RT-qPCR of *Adamts13/Rpl32* mRNA in LVs from WT, Het, and L3-KO littermate male mice at baseline (n=9 WT, n=6 Het, n=9 L3-KO). Data are shown as individual value scatterplot with mean  $\pm$  SEM. Statistical difference between Het vs. WT was tested using the Student's *t*-test. ND, not detected. (d) Images of representative adult WT and L3-KO littermate mice, showing a normal appearance (photos: KB Rypdal).

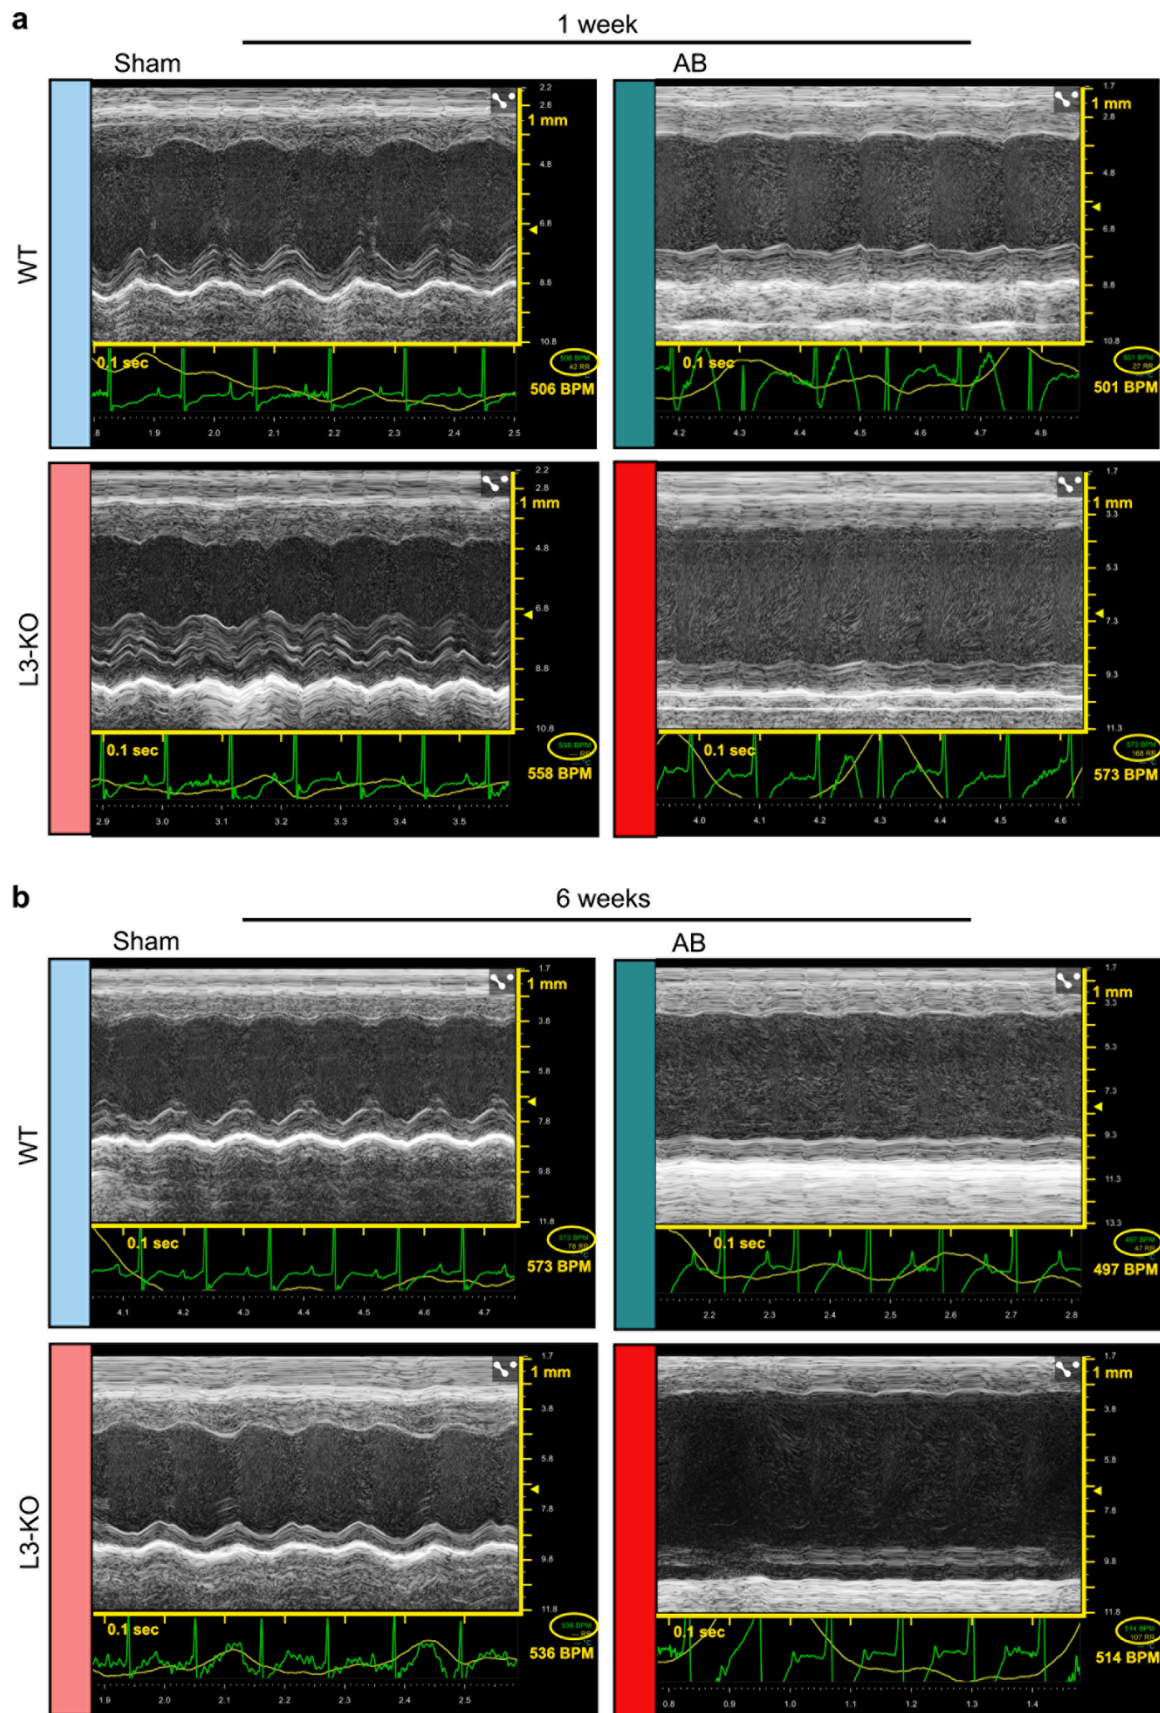

**Fig. S4 Representative echocardiography images of left ventricles corresponding to manuscript Fig. 2** M-mode echocardiography images of wild-type (WT) and *Adamsl3* knock-out (L3-KO) left ventricles (a) one and (b) six weeks after aortic banding (AB) or sham surgery. Scale: 0.1 seconds, x-axis, 1 mm, y-axis. Electrocardiograms are shown in green beneath the x-axis, and heart rate (BPM) is highlighted in yellow in the lower right corners.



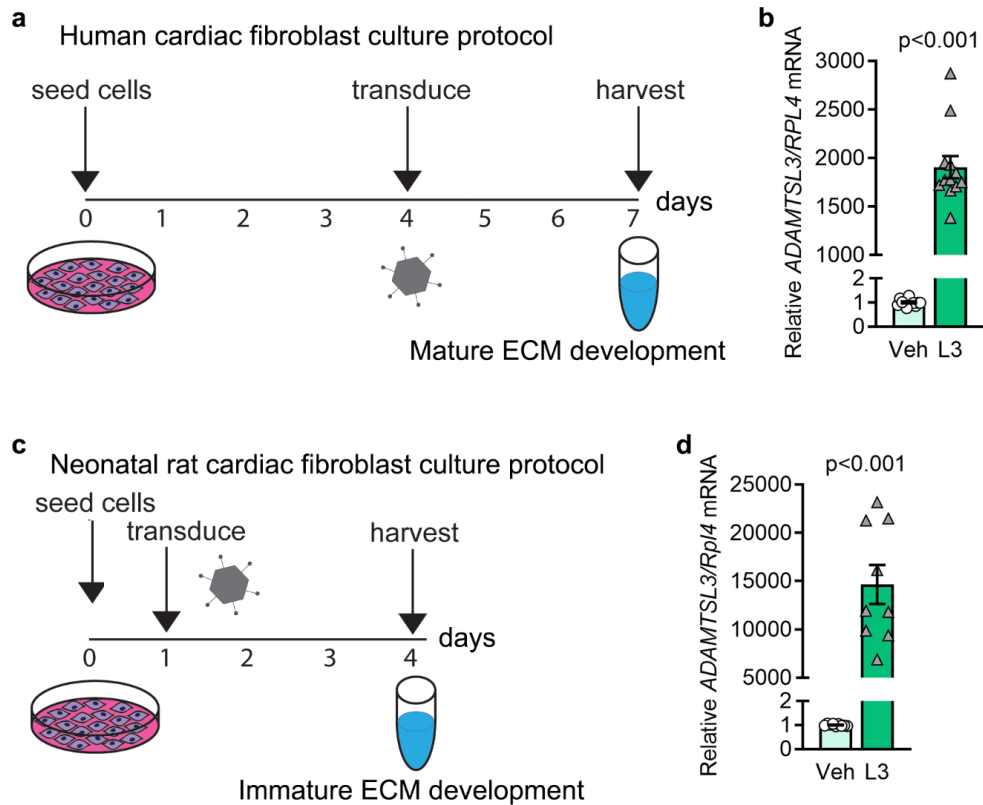

**Fig. S5 Experimental strategy and validation of ADAMTSL3 overexpression in neonatal rat primary cardiac fibroblasts and human foetal cardiac fibroblasts**

(a) Culture protocol for human foetal CFBs. Cells were cultured for a total of seven days, producing a rich ECM network, with a TGF $\beta$ -binding and activating ECM network, as previously described<sup>2</sup>. Cells were transduced with ADAMTSL3 (L3) or control (vehicle, Veh) adenoviruses on day four. (b) qPCR of *ADAMTSL3/RPL4* mRNA in hfCFBs transduced with L3 and Veh. Data represent experiments from three different cell passages. (c) Culture protocol for primary cardiac fibroblasts (CFBs) isolated from 1-3 days old rat hearts. Cells were cultured for a total of four days, producing a developing, immature extracellular matrix (ECM) network, as previously described<sup>2</sup>. Cells were transduced with L3 or Veh 24 h after seeding. (d) qPCR of *ADAMTSL3/Rpl4* mRNA in primary rat CFBs transduced with L3 or Veh (n=3 isolations of n=60 hearts, with n=3 technical replicates per isolation). Data are presented as individual value scatterplots with mean  $\pm$  SEM. Statistical differences were tested between L3 and Veh using the Student's *t*-test.

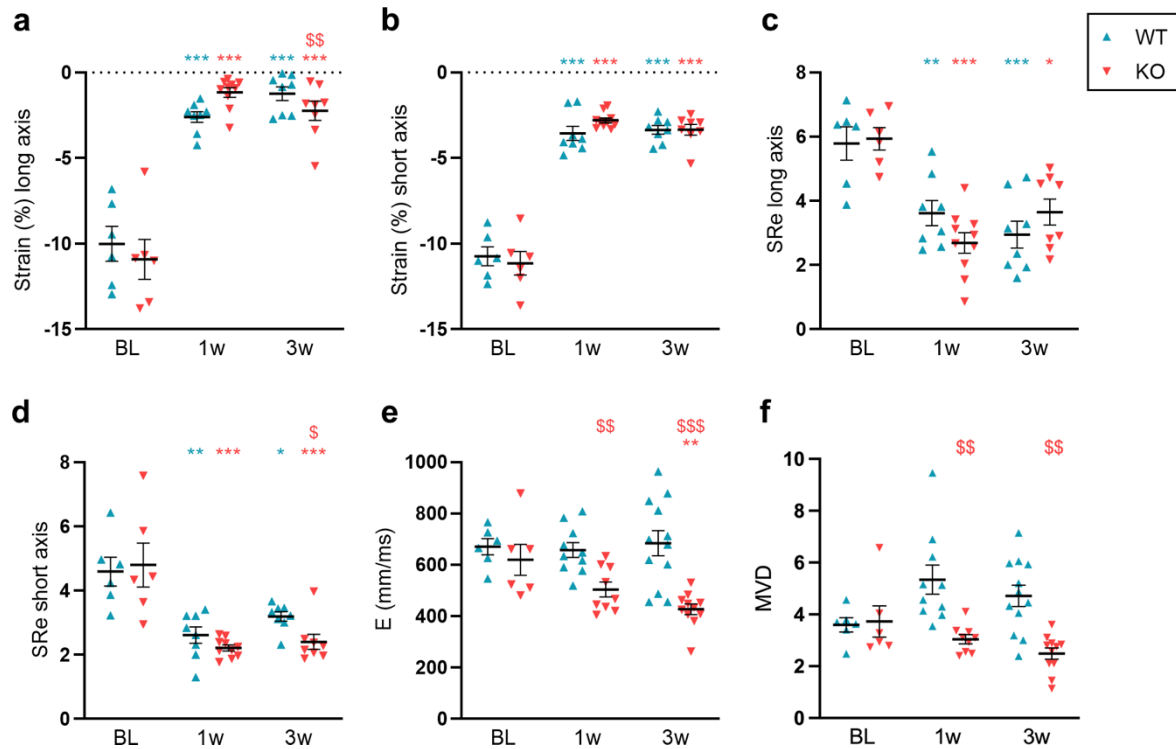

**Fig. S6 *Adamts13* knock-out mice develop increased tissue strain after aortic banding**

(a-b) Mean tissue strain (%) in myocardial long axis (a) and short axis (b) from MRI tissue phase mapping (TPM) recordings, and (c-d) peak strain rate (SRe) in long axis (c) and short axis (d) from TPM recordings, measured at baseline (BL), 1 and 3 weeks post aortic banding (AB), in *Adamts13* knock-out (KO) and wild-type (WT) mice. (e) Peak mitral valve filling velocity in early diastole, and (f) mitral valve deceleration (MVD), measured with Doppler echocardiography at BL, 1 and 3 weeks post-AB in KO and WT mice. Data are presented as individual value scatterplots with mean  $\pm$  SEM. Statistical differences were tested using ordinary one-way ANOVA with Tukey's multiple comparisons test for all groups vs. WT BL at all time-points (\*), and the Student's *t*-test for L3-KO vs WT at discrete time-points (\$). \*/\$ $p < 0.05$ , \*\*/\$\$ $p < 0.01$ , \*\*\*/\$\$\$ $p < 0.001$ .

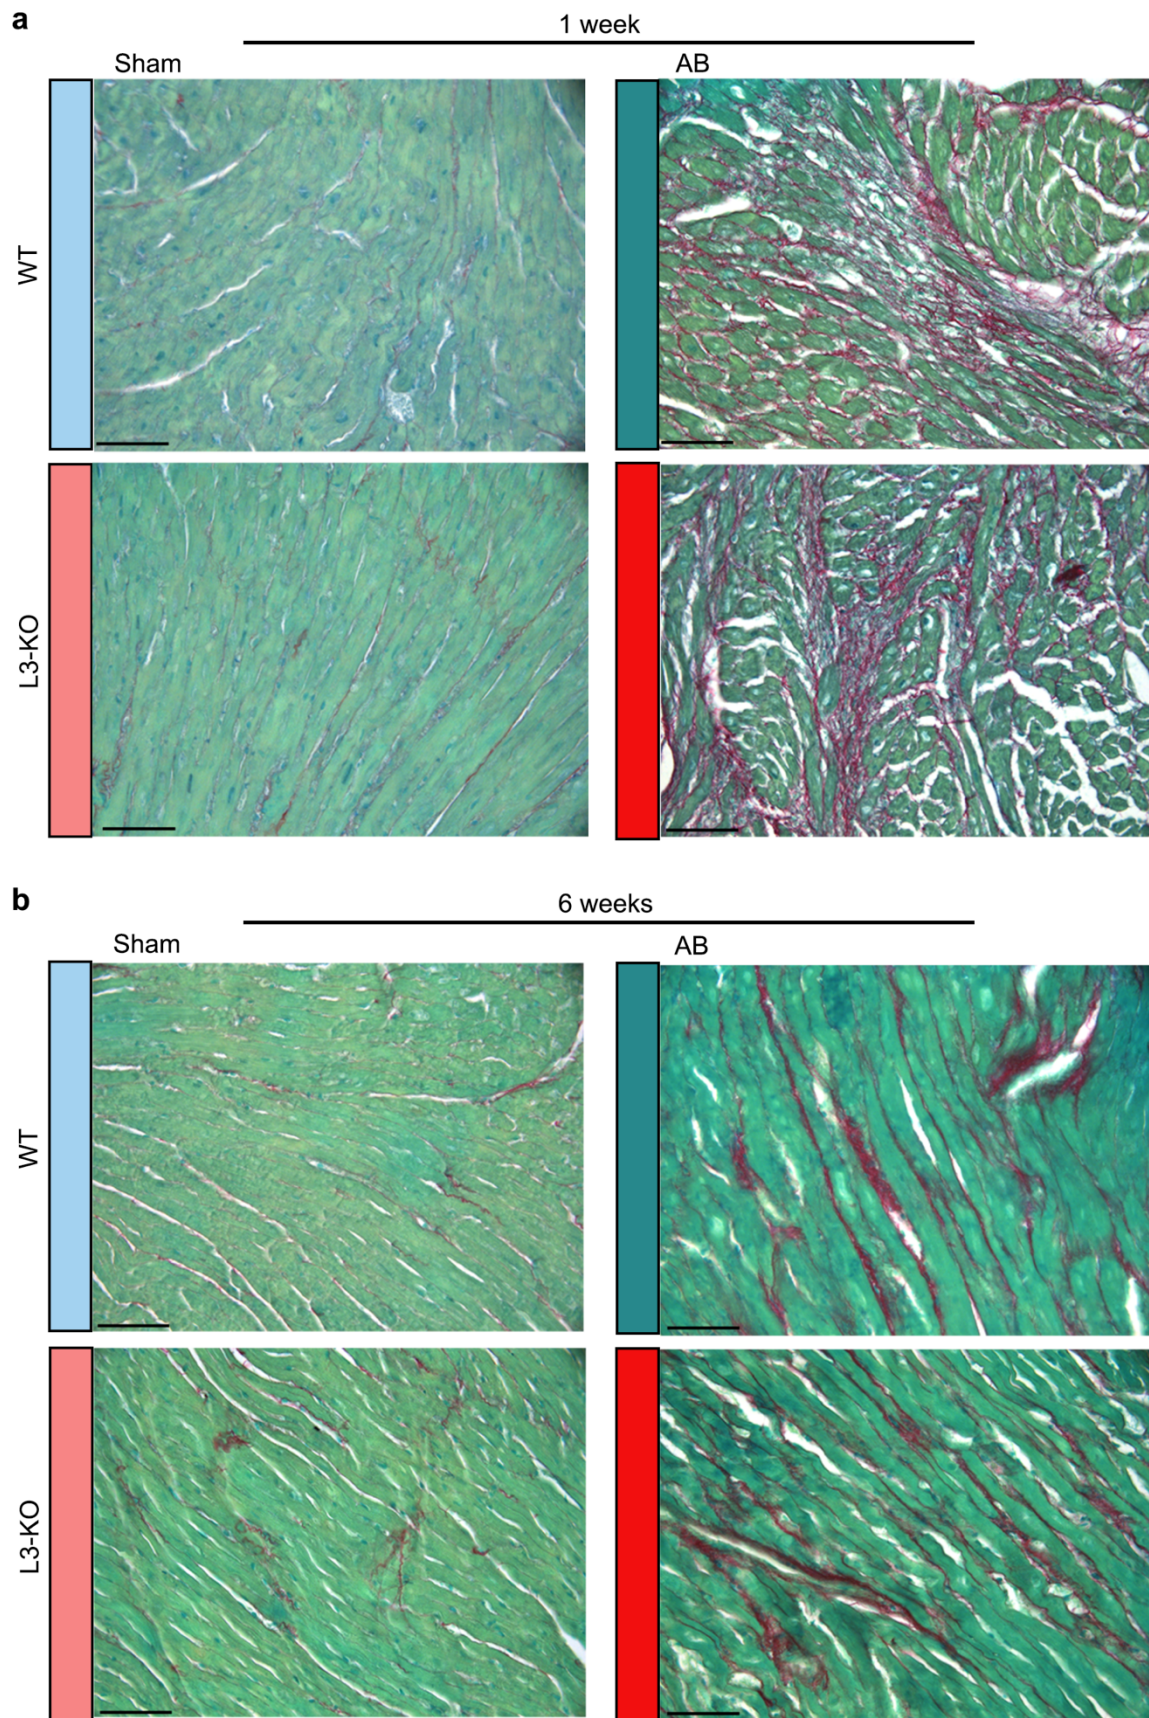

**Fig. S7 Representative histology of mid-ventricular sections corresponding to manuscript Fig. 5** Wild-type (WT) and *Adamsl3* knock-out (L3-KO) mice were subjected to aortic banding (AB) or sham surgery for 1 or 6 weeks. Picosirius Red, Fast Green, and Alcian Blue (RGB)-staining of mid-ventricular sections of WT and L3-KO left ventricles at 1 (**a**) and 6 (**b**) weeks post-AB, showing collagen in red and cardiac muscle tissue in green. Scale bar = 50 $\mu$ m.

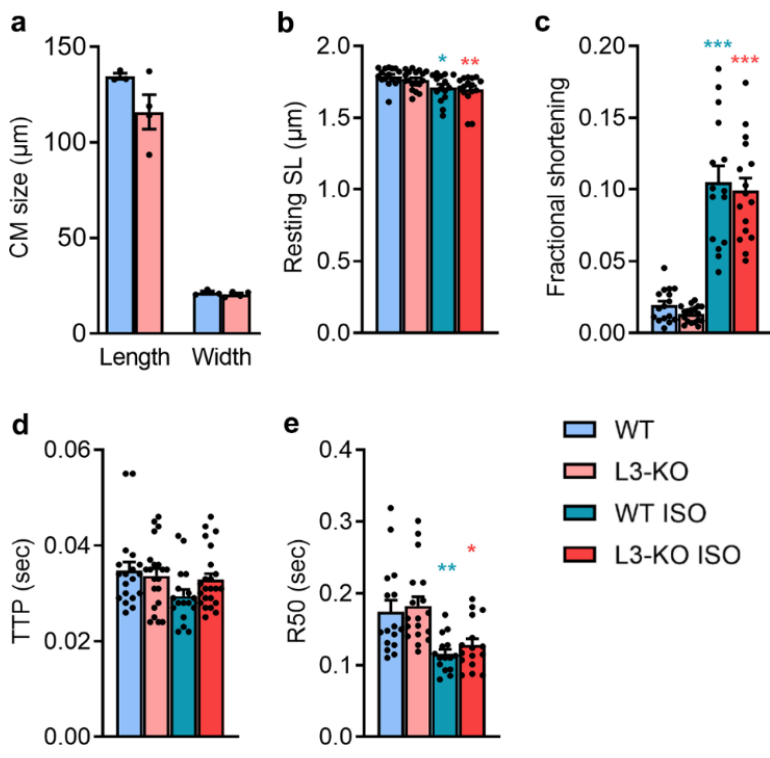

**Fig. S8 Wild-type and *Adamts13* knock-out cardiomyocytes are similar in size at baseline, with similar contraction at baseline and stress**

Isolated cardiomyocytes (CMs) from wild-type (WT, n=3) and *Adamts13* knock-out (L3-KO, n=4) mice. **(a)** CM length and width in WT and L3-KO (n=30 cells per animal). **(b)** Resting sarcomere length (SL) in WT and L3-KO at 1 Hz pacing, at baseline (n=16 WT and n=18 L3-KO cells), and after isoproterenol (ISO, n=15 WT and n=16 L3-KO cells). **(c)** CM contraction at 1 Hz pacing at baseline (n=16 WT and n=18 L3-KO cells), and cell shortening after ISO (n=15 WT and n=16 L3-KO cells). **(d-e)** Contraction and relaxation kinetics with **(d)** time-to-peak contraction (TTP) and **(e)** time from peak to 50% relaxation (R50). Data are individual values with mean  $\pm$  SEM. Statistical analysis was performed using the one-way ANOVA with Dunnett's multiple comparisons test. \*p<0.05, \*\*p<0.01, and \*\*\*p<0.001 for all groups vs. WT.



## Supplementary tables

**Table SI Baseline characteristics of untreated *Adamts13*-KO and WT mice**

|                          | WT          | L3-KO              |
|--------------------------|-------------|--------------------|
| <b>n (biometry)</b>      | 41          | 45                 |
| <b>BW (g)</b>            | 25.39 ±0.45 | 26.09 ±0.41        |
| <b>HW (mg)</b>           | 129.7 ±2.95 | 146.4 ±4.17* (13%) |
| <b>HW/BW</b>             | 5.19 ±0.08  | 5.67 ±0.12* (9%)   |
| <b>Tibia length (mm)</b> | 17.04 ±0.05 | 17.41 ±0.05* (2%)  |
| <b>n (biometry)</b>      | 20          | 22                 |
| <b>LW (mg)</b>           | 151.5 ±4.49 | 157.3 ±3.37        |
| <b>LW/BW</b>             | 5.79 ±0.18  | 5.89 ±0.56         |
| <b>n (echo)</b>          | 15          | 17                 |
| <b>HR (bpm)</b>          | 458 ±11.0   | 458 ±9.74          |
| <b>LVPWd (mm)</b>        | 0.62 ±0.01  | 0.63 ±0.01         |
| <b>IVSd (mm)</b>         | 0.63 ±0.01  | 0.62 ±0.01         |
| <b>LVIDd (mm)</b>        | 4.06 ±0.08  | 4.21 ±0.10         |
| <b>LVIDs (mm)</b>        | 3.13 ±0.09  | 3.32 ±0.11         |
| <b>LAD (mm)</b>          | 1.30 ±0.03  | 1.28 ±0.03         |
| <b>FS (%)</b>            | 23.1 ±1.01  | 21.2 ±1.21         |
| <b>n (MRI)</b>           | 6           | 5                  |
| <b>LVM (mg)</b>          | 84.69 ±3.16 | 99.68 ±10.68       |
| <b>EDV (μL)</b>          | 47.87 ±3.18 | 57.93 ±8.17        |
| <b>EF (%)</b>            | 67.80 ±2.34 | 55.18 ±6.29        |

Baseline biometrics and cardiac phenotype of untreated C57BL/6 wild-type (WT) and *Adamts13* knock-out (L3-KO) mice 8-12 weeks of age. Cardiac structure and function were measured on anesthetized animals breathing 1-2% isoflurane using echocardiography (echo) and cardiac magnetic resonance imaging (MRI). Abbreviations: n, number of animals; BW, body weight; HW, heart weight; HR, heart rate; LVPWd, left ventricular posterior wall thickness in diastole; IVSd, interventricular septum in diastole; LVIDd, left ventricle internal diameter in diastole; LAD, left atrial diameter; FS, fractional shortening; LVM, LV mass; EDV, end diastolic volume; EF, ejection fraction. Data are presented as mean ± SEM. Statistical differences were calculated using the Student's *t*-test, \**p*<0.05 for L3-KO vs. WT.

**Table SII Baseline characteristics of *Adamts13*-KO, heterozygote and WT littermate mice**

|                          | WT          | Het         | L3-KO                                 |
|--------------------------|-------------|-------------|---------------------------------------|
| <b>n</b>                 | 11          | 12          | 13                                    |
| <b>BW (g)</b>            | 27.22 ±0.62 | 27.34 ±0.61 | 27.97 ±0.71                           |
| <b>HW (mg)</b>           | 133.6 ±3.38 | 134.2 ±4.50 | 156.2 ±7.97 *(17%) <sup>§</sup> (16%) |
| <b>HW/BW</b>             | 4.92 ±0.12  | 4.90 ±0.13  | 5.56 ±0.68 *(13%) <sup>§</sup> (13%)  |
| <b>Tibia length (mm)</b> | 17.09 ±0.14 | 17.43 ±0.09 | 17.56 ±0.10 *(3%)                     |

Biometric parameters of wild-type (WT), heterozygotes (Het) and *Adamts13* knock-out (L3-KO) 12-16 weeks old C57BL/6 mice at baseline. % increase of L3-KO values are shown in parentheses. Abbreviations: n, number of animals; BW, body weight; HW, heart weight. Data are presented as mean ± SEM. Statistical differences were calculated using the ordinary ANOVA with Tukey's multiple comparisons test, \**p*<0.05 L3-KO vs. WT, <sup>§</sup>*p*<0.05 L3-KO vs. Het.



Table SIII TaqMan gene expression assays used for qPCR

| Gene            | Assay name    | Species | Gene            | Assay name    | Species |
|-----------------|---------------|---------|-----------------|---------------|---------|
| <i>ACTA2</i>    | Hs00426835_g1 | Human   | <i>Adamtsl3</i> | Mm01312414_m1 | Mouse   |
| <i>ADAMTSL3</i> | Hs00324954_m1 | Human   | <i>Acta2</i>    | Mm00725412_s1 | Mouse   |
| <i>COL1A2</i>   | Hs01028956_m1 | Human   | <i>Coll1a1</i>  | Mm00801666_g1 | Mouse   |
| <i>COL1A1</i>   | Hs00164004_m1 | Human   | <i>Coll1a2</i>  | Mm00483888_m1 | Mouse   |
| <i>COL3A1</i>   | Hs00943809_m1 | Human   | <i>Col3a1</i>   | Mm00802305_g1 | Mouse   |
| <i>CTGF</i>     | Hs00170014_m1 | Human   | <i>Ctgf</i>     | Mm01192933_g1 | Mouse   |
| <i>ELN</i>      | Hs00355783_m1 | Human   | <i>Fbn1</i>     | Mm00514908_m1 | Mouse   |
| <i>FBN1</i>     | Hs00171191_m1 | Human   | <i>Fbn2</i>     | Mm00515713_m1 | Mouse   |
| <i>FBN2</i>     | Hs00266592_m1 | Human   | <i>Fn1</i>      | Mm01256744_m1 | Mouse   |
| <i>FN1</i>      | Hs01549976_m1 | Human   | <i>Lox</i>      | Mm00495386_m1 | Mouse   |
| <i>KI67</i>     | Hs00606991_m1 | Human   | <i>Ltbp1</i>    | Mm00498234_m1 | Mouse   |
| <i>LOX</i>      | Hs00942482_g1 | Human   | <i>Myh6</i>     | Mm00440359_m1 | Mouse   |
| <i>LTBP1</i>    | Hs01558763_m1 | Human   | <i>Myh7</i>     | Mm00600555_m1 | Mouse   |
| <i>MCM2</i>     | Hs01091564_m1 | Human   | <i>Nppa</i>     | Mm01255747_g1 | Mouse   |
| <i>PCNA</i>     | Hs00427214_g1 | Human   | <i>Nppb</i>     | Mm01255770_g1 | Mouse   |
| <i>POSTN</i>    | Hs01566750_m1 | Human   | <i>Postn</i>    | Mm01284913_g1 | Mouse   |
| <i>RPL32</i>    | Hs00851655_g1 | Human   | <i>Rpl32</i>    | Mm02528467_g1 | Mouse   |
| <i>RPL4</i>     | Hs03044646_g1 | Human   | <i>Spp1</i>     | Mm00436767_m1 | Mouse   |
| <i>SPPI</i>     | Hs00959010_m1 | Human   | <i>Tgfb1</i>    | Mm01178820_m1 | Mouse   |
| <i>TGFBI</i>    | Hs00998133_m1 | Human   | <i>Adamtsl3</i> | Rn01477616_m1 | Rat     |

## Supplementary references

- 1 Hall, N. G., Klenotic, P., Anand-Apte, B. & Apte, S. S. ADAMTSL-3/punctin-2, a novel glycoprotein in extracellular matrix related to the ADAMTS family of metalloproteases. *Matrix Biol.* **22**, 501-510 (2003).
- 2 Rypdal, K. B. *et al.* The extracellular matrix glycoprotein ADAMTSL2 is increased in heart failure and inhibits TGFbeta signalling in cardiac fibroblasts. *Sci. Rep.* **11**, 19757 (2021). <https://doi.org/10.1038/s41598-021-99032-2>

# Supplementary blots

Fig. 1 blots

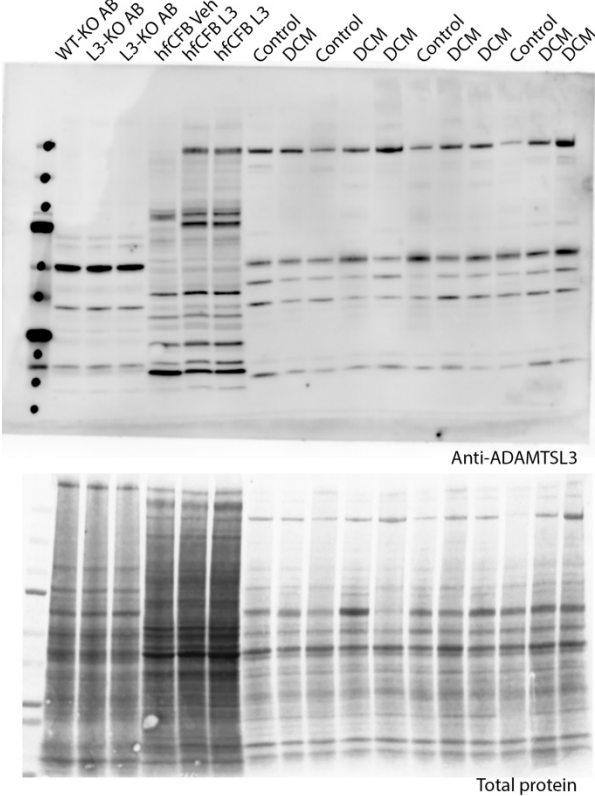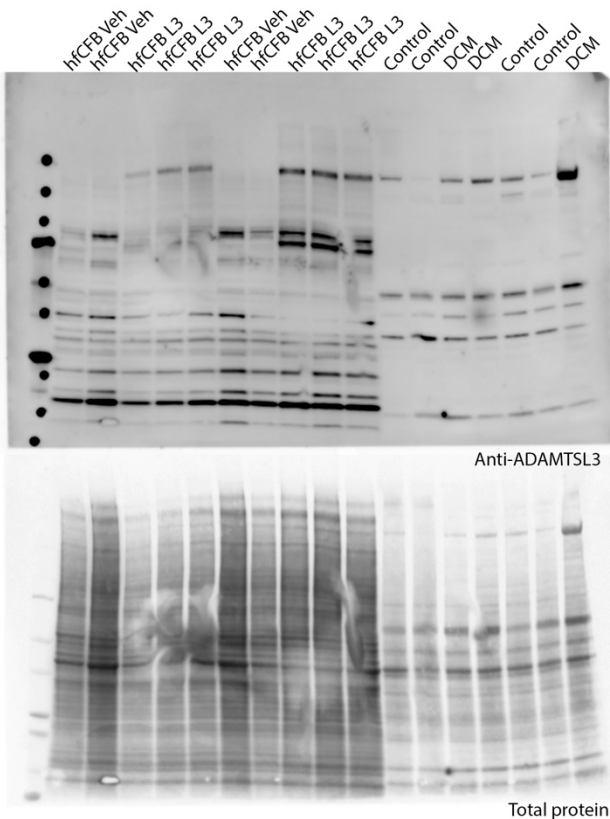

**Fig. 4 blots**

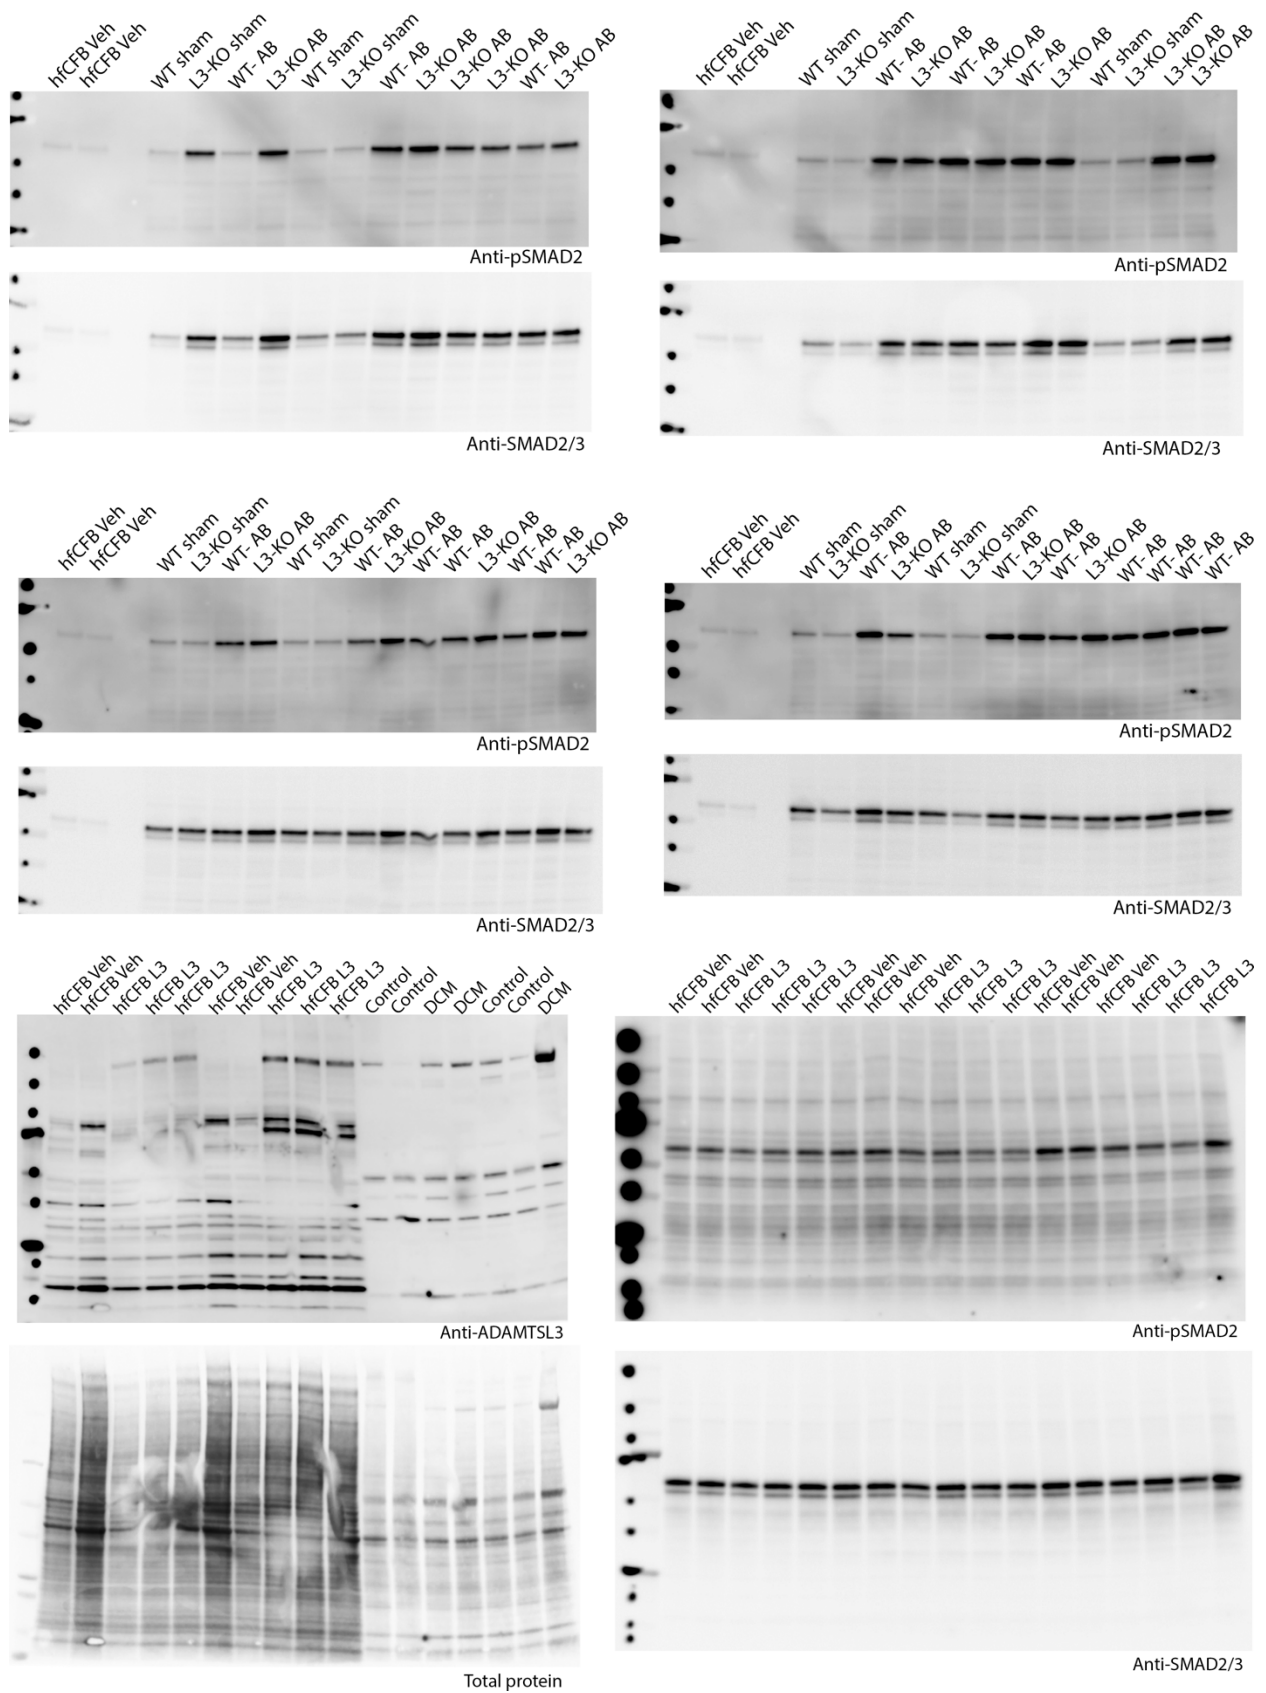

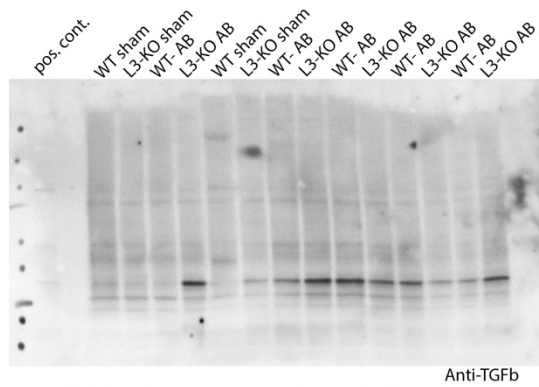

Anti-TGFb

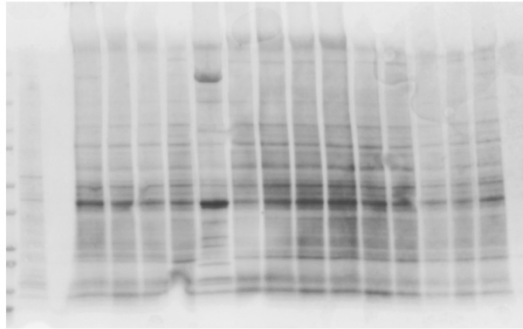

Total protein

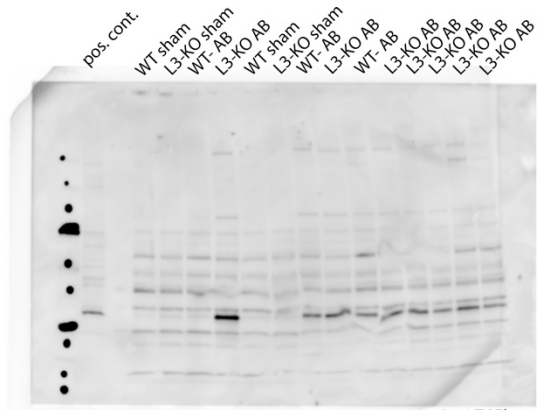

Anti-TGFb

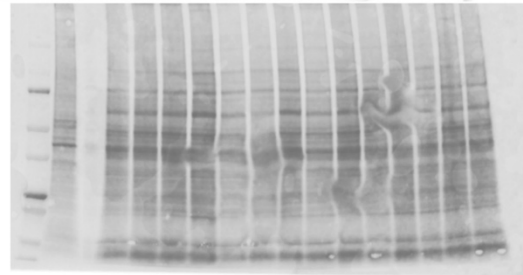

Total protein

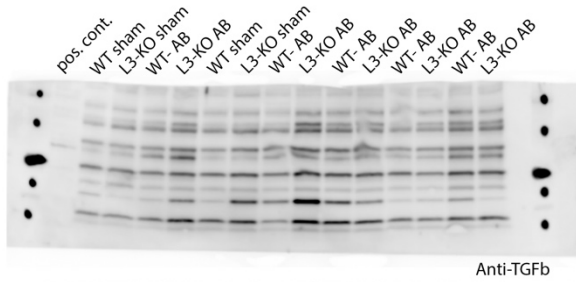

Anti-TGFb

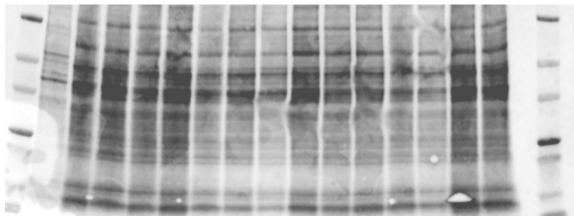

Total protein

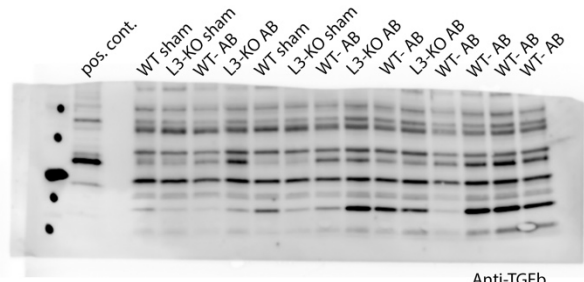

Anti-TGFb

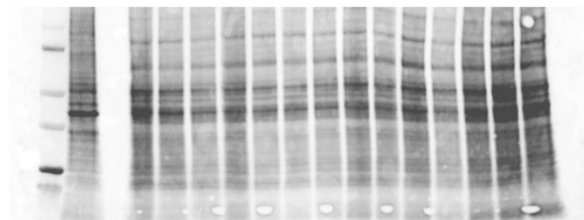

Total protein



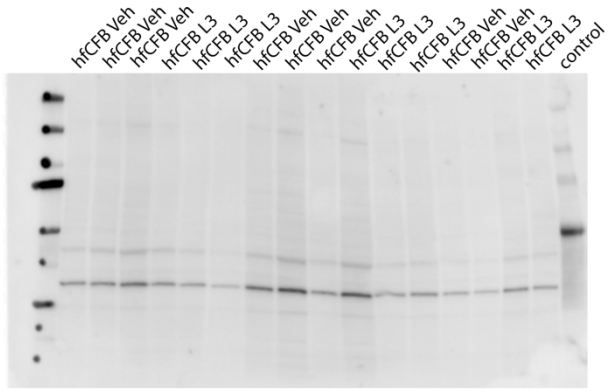

Anti-TGFb

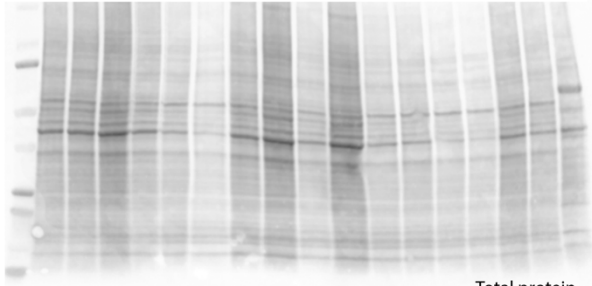

Total protein

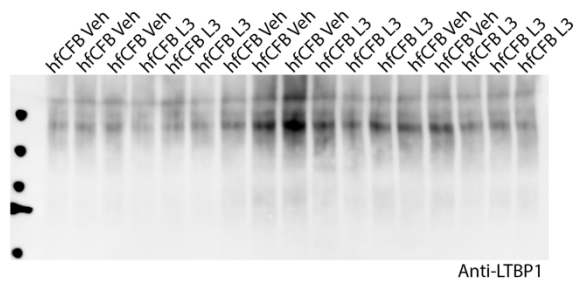

Anti-LTBP1

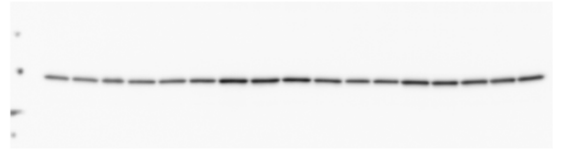

Anti-GAPDH

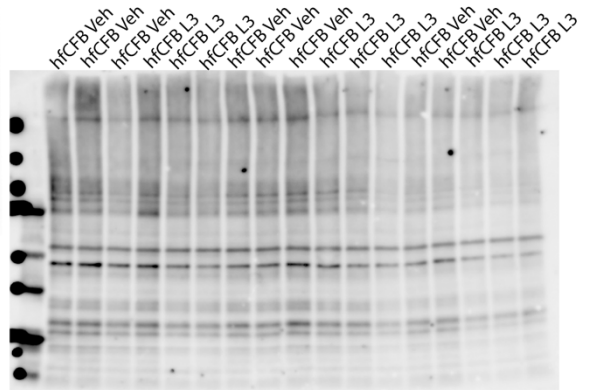

Anti-LAP

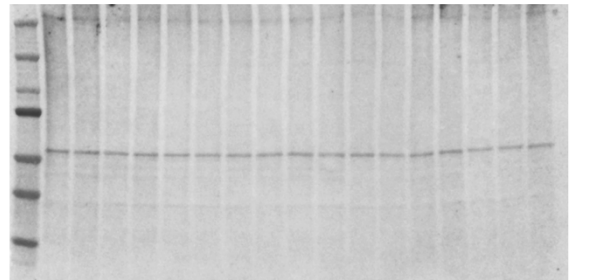

Total protein

Fig. 6 blots

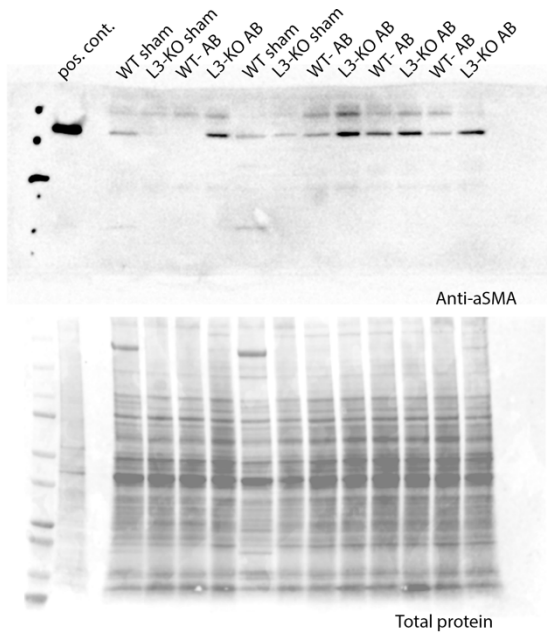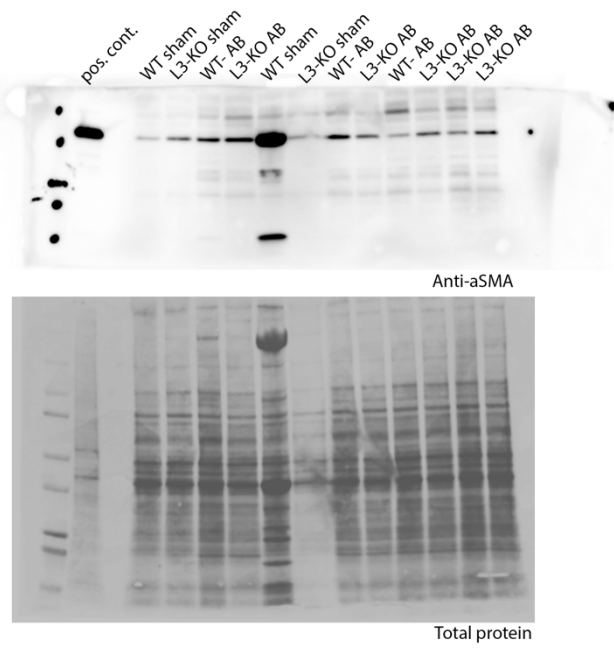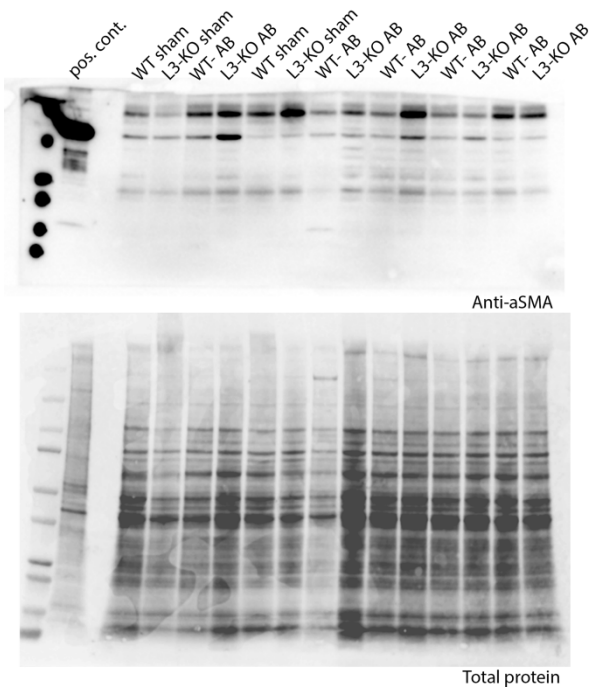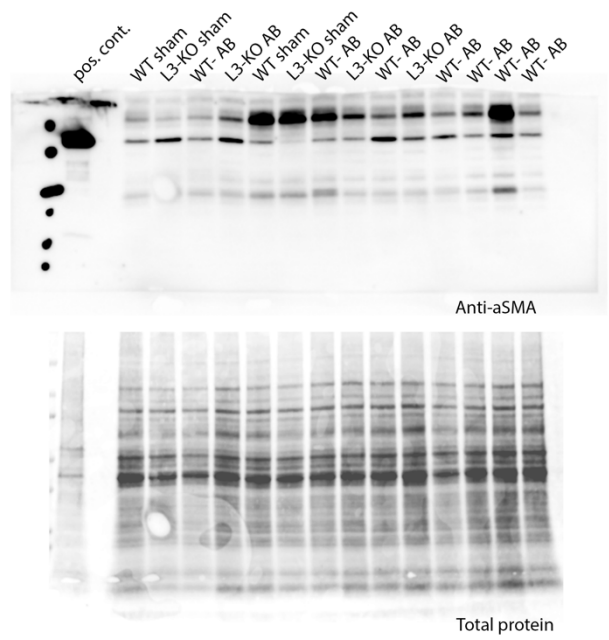

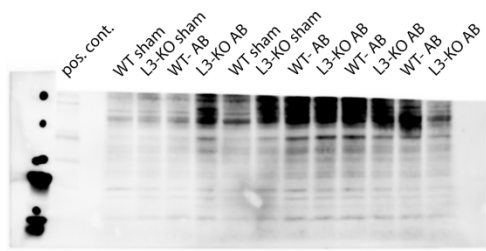

Anti-OPN

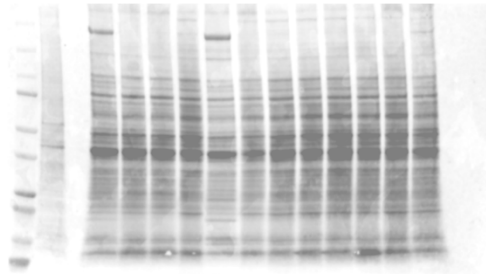

Total protein

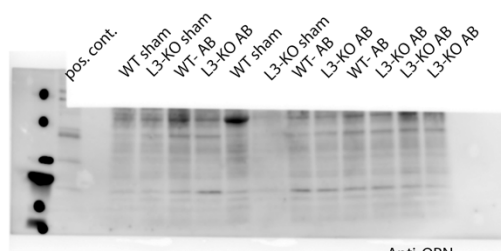

Anti-OPN

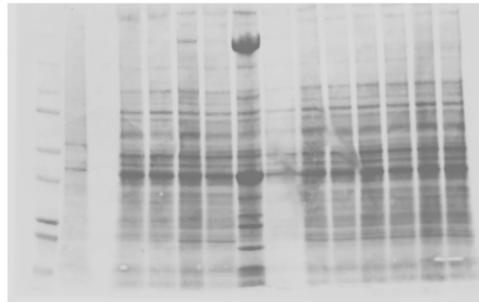

Total protein

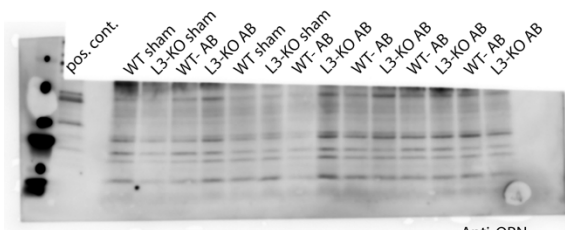

Anti-OPN

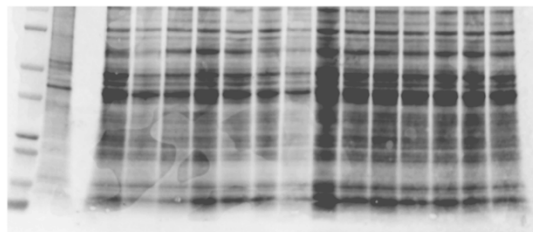

Total protein

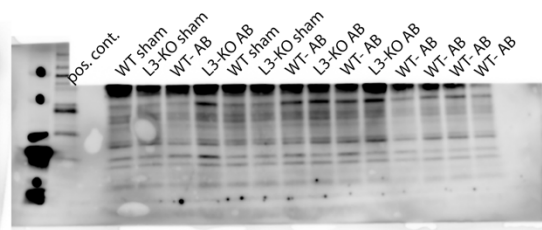

Anti-OPN

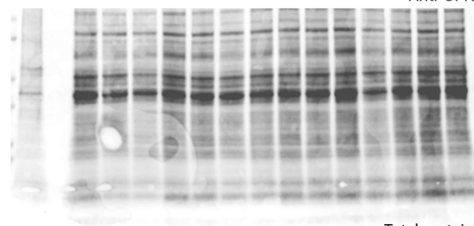

Total protein

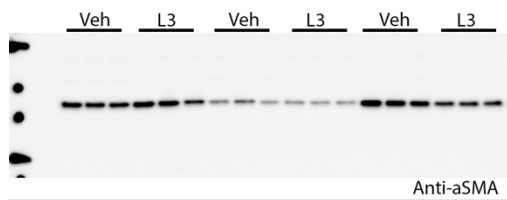

Anti-aSMA

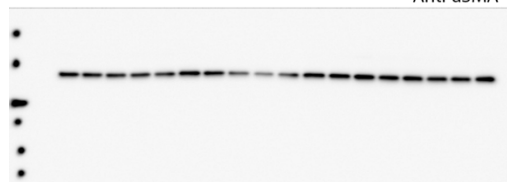

Anti-GAPDH

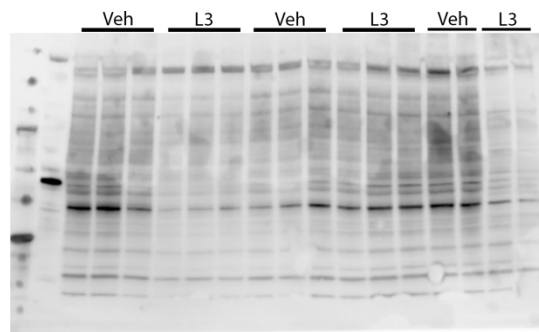

Anti-OPN

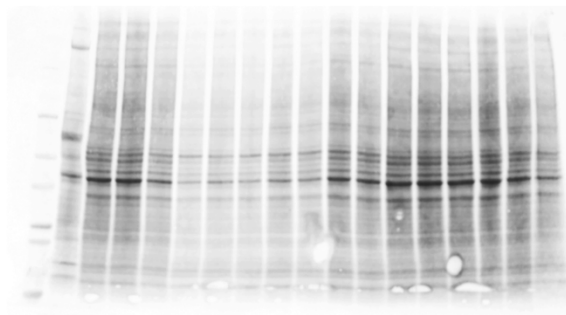

Total protein
